# Supplementary material for: Defining the dimensions of circulating tumor cells in a large series of breast, prostate, colon, and bladder cancer patients
Source: PubMed Central journal article supplement (PMC7782084; doi:10.1002/1878-0261.12802), 2020-10-04
Supplement: MOL2-15-116-s002.pdf [file MOL2-15-116-s002.pdf]

## Supplemental Tables

| Clinical trials |                        |                             |           |                               |
|-----------------|------------------------|-----------------------------|-----------|-------------------------------|
| Tumor Type      | Local study name       | Dutch trial register number | EMC-METC  | Number of included cartridges |
| Breast          | 248                    |                             | MEC06-248 | 253                           |
|                 | 405                    |                             | MEC09-405 | 297                           |
|                 | CareMore – AI          | NL4884                      | MEC14-588 | 92                            |
|                 | CareMore – Trastuzumab | NL4977                      | MEC14-589 | 39                            |
|                 | CTC-cDDP               | NL3885                      | MEC13-007 | 55                            |
|                 | IMPACT                 |                             | MEC16-313 | 159                           |
|                 | Liquor                 | NL5408                      | MEC15-419 | 75                            |
| Prostate        | CABARESC               | NL2849                      | MEC11-324 | 210                           |
|                 | Prelude                |                             | N.A.      | 41                            |
|                 | Process                |                             | MEC16-464 | 24                            |
| Colorectal      | Miracle                |                             | MEC15-289 | 151                           |
|                 | RMD                    |                             | MEC06-089 | 265                           |
| Bladder         | CirGuidance            | NL3954                      | MEC13-301 | 301                           |

**Supplemental Table 1.** Trial details of included cartridges. For more information visit: <https://www.trialregister.nl/>

| Origin cells               | Cell type   | Number of ACCEPT events |
|----------------------------|-------------|-------------------------|
| Breast cancer cell line    | MCF-7       | 1616                    |
|                            | SKBR-3      | 530                     |
|                            | TD47D       | 1249                    |
| Prostate cancer cell line  | LNCAP       | 1054                    |
| Patient derived leukocytes | Lymphocytes | 130                     |

**Supplemental Table 2.** ACCEPT results Reference data

|            |        | ACCEPT - Results                      |                                            |                                                  |
|------------|--------|---------------------------------------|--------------------------------------------|--------------------------------------------------|
|            |        | N Events<br>(% of CellSearch® result) | N CK+ events<br>(% of total ACCEPT result) | N CK+/DAPI+ events<br>(% of total ACCEPT result) |
| Breast     | Total  | 51022 (99%)                           | 50795                                      | 44672                                            |
|            | Blood  | 45695 (94.3%)                         | 45472 (99.5%)                              | 39394 (86.2%)                                    |
|            | Liquor | 5327 (162%)                           | 5323 (99.9%)                               | 5278 (99.1%)                                     |
| Prostate   |        | 20624 (100.1%)                        | 20100 (97.5%)                              | 18421 (89.3%)                                    |
| Colorectal |        | 934 (149%)                            | 519 (55.6%)                                | 442 (47.3%)                                      |
| Bladder    |        | 260 (100%)                            | 198 (76.2%)                                | 189 (72.69%)                                     |

**Supplemental Table 3.** Description of ACCEPT events in relation to CellSearch® data

|              |        | DAPI - Type of ACCEPT event |            |         |               |               |       |
|--------------|--------|-----------------------------|------------|---------|---------------|---------------|-------|
|              |        | Material                    | Single CTC | Doublet | Small cluster | Large cluster | Total |
| Breast       | Blood  |                             | 33696      | 624     | 23            | 0             | 34343 |
|              | Liquor |                             | 4515       | 58      | 2             | 0             | 4575  |
| Prostate     | Blood  |                             | 13127      | 224     | 5             | 0             | 13356 |
| Colorectal   | Blood  |                             | 252        | 3       | 0             | 0             | 255   |
| Bladder      | Blood  |                             | 93         | 4       | 2             | 0             | 99    |
| <b>Total</b> |        |                             | 51683      | 913     | 32            | 0             | 52628 |

**Supplemental Table 4.** Nucleus singularity determination (in CK+, single CTC, DAPI+, DAPI<CK ACCEPT events)
